# Supplementary material for: Effects of rainfall exclusion on leaf gas exchange traits and osmotic adjustment in mature canopy trees of Dryobalanops aromatica (Dipterocarpaceae) in a Malaysian tropical rain forest
Source: Oxford University Press journal article supplement (doi:10.1093/treephys/tpx053), 2017-05-06

**Supporting Information To**

**Effects of rainfall exclusion on leaf gas exchange traits and osmotic adjustment in mature canopy trees of *Dryobalanops aromatica*  
(Dipterocarpaceae) in a Malaysian tropical rain forest**

Yuta Inoue <sup>1,3,6</sup>, Tomoaki Ichie <sup>2</sup>, Tanaka Kenzo <sup>3</sup>, Aogu Yoneyama <sup>2</sup>, Tomoomi Kumagai <sup>4</sup> and Tohru Nakashizuka <sup>5</sup>

<sup>1</sup> United Graduate School of Agricultural Sciences, Ehime University, Matsuyama, Japan

<sup>2</sup> Faculty of Agriculture, Kochi University, Nankoku, Japan

<sup>3</sup> Forestry and Forest Products Research Institute, Tsukuba, Japan

<sup>4</sup> Institute for Space-Earth Environmental Research, Nagoya University Furo-cho, Chikusa-ku, Nagoya, Japan

<sup>5</sup> Department of Environmental Life Science, Graduate School of Life Science, Tohoku University, 6-3 Aramaki, Aoba-Ku, Sendai, Miyagi, Japan

<sup>6</sup> Author for correspondence (e-mail: [inoueyu03@gmail.com](mailto:inoueyu03@gmail.com); Tel/ Fax: +81-29-829-8220)

**Figure S1.** Photographs of leaves from *D. aromatica* at the canopy surface after the infiltration of a 1% acid fuchsin solution during the experiment for treatment tree (D3). Measurement times were (a) 09:00, (b) 13:00, (c) 13:30 on 24 December 2008.

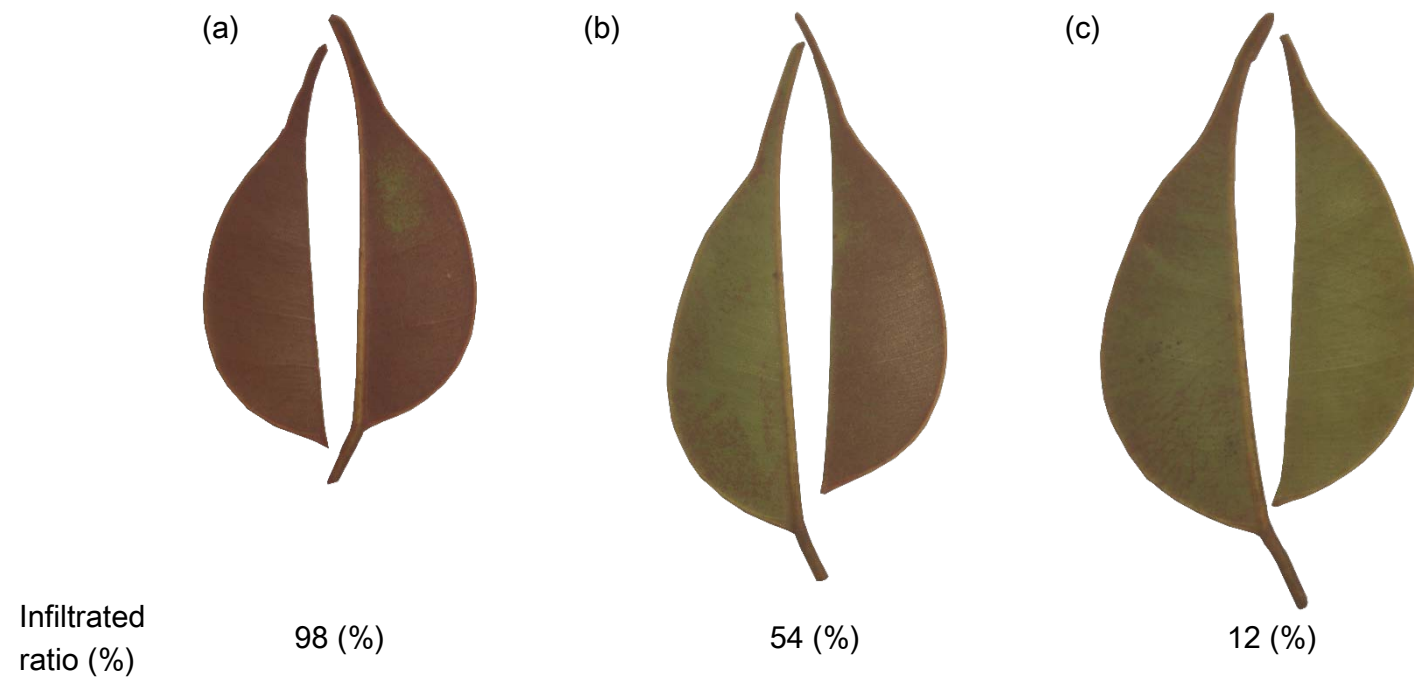

Supplement: tpx053_figs1.pdf [file tpx053_figs1.pdf]
